# Supplementary material for: Hearing loss and cognitive function among older adults in 18 high-income countries: Moderating and Mediating factors
Source: Research Square preprint supplement (doi:10.21203/rs.3.rs-7371554/v1), 2025-10-27
Supplement: Supplementary file 1 [file 39cf506e9c8c964b61152d57.docx]

Supplementary Table S1. Demographic Characteristics of Participants (N=38,506)

| **Variable** | **Total participants** | **No hearing loss** | **Hearing loss** | **p-value** |
| --- | --- | --- | --- | --- |
| **Cognitive function (SD)** |  |  |  |  |
| Temporary orientation | 3.79(0.60) | 3.82(0.54) | 3.70(0.74) | < 0.001 |
| Memory | 8.19(3.56) | 8.52(3.53) | 7.25(3.48) | < 0.001 |
| Numeracy | 4.22(1.30) | 4.26(1.26) | 4.10(1.39) | < 0.001 |
| Verbal fluency | 18.42(7.41) | 18.88(7.49) | 17.13(7.03) | < 0.001 |
| **Mean age (%)** |  |  |  | < 0.001 |
| 65-74 | 21,415(56%) | 17,407(61%) | 4,008(40%) |  |
| 75-84 | 13,138(34%) | 8,964(31%) | 4,174(42%) |  |
| >= 85 | 3,953(10%) | 2,095(7%) | 1,858(19%) |  |
| **Education levels (%)** |  |  |  | < 0.001 |
| Less than upper secondary education | 18,763(49%) | 13,170(46%) | 5,593(56%) |  |
| Upper secondary and vocational training | 12,487(32%) | 9,601(34%) | 2,886(29%) |  |
| Tertiary education | 7,256(19%) | 5,695(20%) | 1,561(16%) |  |
| **Gender (%)** |  |  |  | < 0.001 |
| Female | 21,186(55%) | 16,060(56%) | 5,126(51%) |  |
| Male | 17,320(45%) | 12,406(44%) | 4,914(49%) |  |
| **Married or partnered (%)** |  |  |  | < 0.001 |
| No | 13,273(34%) | 9,315(33%) | 3,958(39%) |  |
| Yes | 25,233(66%) | 19,151(67%) | 6,082(61%) |  |
| **Geographic regions (%)** |  |  |  | < 0.001 |
| Northen Europe | 4,564(12%) | 3,655(13%) | 909(9%) |  |
| Southern Europe | 10,133(26%) | 7,364(26%) | 2,769(28%) |  |
| Eastern Europe | 10,633(28%) | 7,370(26%) | 3,263(33%) |  |
| Western Europe | 11,843(31%) | 9,106(32%) | 2,737(27%) |  |
| Israel | 1,333(3%) | 971(3%) | 362(4%) |  |

Note: Chi-square tests were used for categorical variables and t-tests for continuous variables. All p-values are based on two-sided tests.

Supplementary Table S2. Robustness testing of the association between hearing loss and cognitive function

| **Variables** | **Replace hearing loss to continuous** | **Change the model evaluation method** | | | **Reset the machine learning model** | | |
| --- | --- | --- | --- | --- | --- | --- | --- |
|  |  | **Kfolds = 3** | **Kfolds = 7** | **Random forest** | | **Gradient boosting** | **Neural network** |
| **Temporary Orientation** | -0.022 | -0.06 | -0.06 | -0.058 | | -0.059 | -0.035 |
|  | [-0.0284, -0.0159] | [-0.0759, -0.045] | [-0.0757, -0.0449] | [-0.0737, -0.0426] | | [-0.0748, -0.044] | [-0.0514, -0.0194] |
| **Memory** | -0.223 | -0.446 | -0.447 | -0.411 | | -0.425 | -0.415 |
|  | [-0.2541, -0.1911] | [-0.5188, -0.3737] | [-0.5193, -0.3743] | [-0.4832, -0.3395] | | [-0.4969, -0.353] | [-0.487, -0.3432] |
| **Numeracy** | -0.037 | -0.061 | -0.061 | -0.073 | | -0.052 | -0.058 |
|  | [-0.0495, -0.0241] | [-0.0914, -0.0298] | [-0.0915, -0.03] | [-0.1038, -0.0421] | | [-0.0825, -0.0212] | [-0.0882, -0.0268] |
| **Verbal fluency** | -0.249 | -0.379 | -0.379 | -0.362 | | -0.405 | -0.33 |
|  | [-0.3143, -0.1841] | [-0.5294, -0.2289] | [-0.5287, -0.2282] | [-0.508, -0.2164] | | [-0.5496, -0.26] | [-0.4746, -0.1852] |

Note: 95% confidence intervals in square brackets.
